# Supplementary material for: A surface-mounted MOF thin film with oriented nanosheet arrays for enhancing the oxygen evolution reaction
Source: Royal Society of Chemistry journal article supplement (doi:10.1039/c9ta04554f), 2019-01-01
Supplement: c9ta04554f1.pdf [file c9ta04554f1.pdf]

## Supporting Information

### **Surface-Mounted MOF Thin Film with Oriented Nanosheet Arrays for Enhancing Oxygen Evolution Reaction**

*De-Jing Li,<sup>ab§</sup> Qiao-Hong Li,<sup>a§</sup> Zhi-Gang Gu<sup>a\*</sup> and Jian Zhang<sup>a</sup>*

<sup>a</sup> State Key Laboratory of Structural Chemistry, Fujian Institute of Research on the Structure of Matter, Chinese Academy of Sciences, Fuzhou, Fujian 350002, P. R. China

<sup>b</sup> University of Chinese Academy of Sciences, Beijing 100049, P.R. China

<sup>§</sup> These authors contributed equally to this work

E-mail: [zggu@fjirsm.ac.cn](mailto:zggu@fjirsm.ac.cn)

## Table of content

---

**Scheme S1.** Schematic illustration of the formation of  $M_2(BDC)_2TED$  on the substrate.

---

**Figure S1.** The surface SEM images of  $M_2(BDC)_2TED$  MOF grown on the Cu foil: (a) (b)  $Co_2(BDC)_2TED$ ; (c) (d)  $Ni_2(BDC)_2TED$ .

---

**Figure S2.** (a)  $N_2$  adsorption isotherm and (b) pore size distribution of  $Co/Ni(BDC)_2TED$  nanosheets stripped from Cu foam.

---

**Figure S3.** The IR spectrum of  $Co_2(BDC)_2TED$ ,  $Ni_2(BDC)_2TED$  and  $Co/Ni(BDC)_2TED$  nanosheets stripped from Cu foam.

---

**Figure S4.** The XPS survey of  $Co/Ni(BDC)_2TED@CF$ .

---

**Figure S5.** The XPS results: (a) (b)  $Co_2(BDC)_2TED@CF$ ; (c) (d)  $Ni_2(BDC)_2TED@CF$ .

---

**Figure S6.** The surface SEM images of  $M_2(BDC)_2TED$  MOF grown on the Cu foam: (a, b, c)  $Co_2(BDC)_2TED@CF$ ; (d, e, f)  $Ni_2(BDC)_2TED@CF$ .

---

**Figure S7.** The setup of electrochemical measurement.

---

**Figure S8.** LSV curves in the reverse sweep direction.

---

**Figure S9.** (a) CVs of bare Cu foam at the different scan rates from 10-100  $mV s^{-1}$  in the potential range of 0.01-0.1 V vs Ag/AgCl and (b) Capacitive current at 0.06 V vs Ag/AgCl.

---

**Figure S10.** (a) CVs of  $Co/Ni(BDC)_2TED@CF$  at the different scan rates from 10-100  $mV s^{-1}$  in the potential range of 0.01-0.1 V vs Ag/AgCl and (b) Capacitive current at 0.06 V vs Ag/AgCl.

---

**Figure S11.** (a) CVs of  $Co_2(BDC)_2TED@CF$  at the different scan rates from 10-100  $mV s^{-1}$  in the potential range of 0.01-0.1 V vs Ag/AgCl and (b) Capacitive current at 0.06 V vs Ag/AgCl.

---

**Figure S12.** (a) CVs of  $Ni_2(BDC)_2TED@CF$  at the different scan rates from 10-100  $mV s^{-1}$  in the potential range of 0.01-0.1 V vs Ag/AgCl and (b) Capacitive current at 0.06 V vs Ag/AgCl.

---

**Figure S13.** The ECSA normalized LSV curves.

---

**Figure S14.** (a) The XRD of  $Co/Ni(BDC)_2TED$  powder; (b) The SEM image of  $Co/Ni(BDC)_2TED$

---

---

powder deposited on Cu foam; (c) The LSV curves of Co/Ni(BDC)<sub>2</sub>TED deposited on Cu foam and Co/Ni(BDC)<sub>2</sub>TED@CF; (d) Chronopotentiometric curves of Co/Ni(BDC)<sub>2</sub>TED deposited on Cu foam and Co/Ni(BDC)<sub>2</sub>TED@CF.

---

**Figure S15.** Faradaic efficiency for Co/Ni(BDC)<sub>2</sub>TED@CF at the current density of 50 mA cm<sup>-2</sup>.

---

**Figure S16.** (a) CV of Co/Ni(BDC)<sub>2</sub>TED@CF at different scan rates of 5, 10, 15, 20, and 25 mV s<sup>-1</sup> in 1.0 M KOH and (b) the linear relationship of the oxidation peak currents vs. scan rates for the Co/Ni(BDC)<sub>2</sub>TED@CF.

---

**Figure S17.** (a) CV of Ni<sub>2</sub>(BDC)<sub>2</sub>TED@CF at different scan rates of 5, 10, 15, 20, and 25 mV s<sup>-1</sup> in 1.0 M KOH and (b) the linear relationship of the oxidation peak currents vs. scan rates for the Ni<sub>2</sub>(BDC)<sub>2</sub>TED@CF.

---

**Figure S18.** (a) CV of Co<sub>2</sub>(BDC)<sub>2</sub>TED@CF at different scan rates of 5, 10, 15, 20, and 25 mV s<sup>-1</sup> in 1.0 M KOH and (b) the linear relationship of the oxidation peak currents vs. scan rates for the Co<sub>2</sub>(BDC)<sub>2</sub>TED@CF.

---

**Figure S19.** The SEM images after the electrochemical testing at 50 mA cm<sup>-2</sup> for 10000s: (a) Co<sub>2</sub>(BDC)<sub>2</sub>TED@CF; (b) Ni<sub>2</sub>(BDC)<sub>2</sub>TED@CF; (c) Co/Ni(BDC)<sub>2</sub>TED@CF; (d) The TEM images of Co/Ni(BDC)<sub>2</sub>TED@CF after the electrochemical testing at 50 mA cm<sup>-2</sup> for 10000 s.

---

**Figure S20.** (a) The XRD and (b) IR of Co/Ni(BDC)<sub>2</sub>TED@CF after the electrochemical testing.

---

**Figure S21.** The XPS results of Co/Ni(BDC)<sub>2</sub>TED@CF after OER cycling.

---

**Table S1.** Comparison of Electrocatalytic Performances of Various Materials.

---

**Figure S22.** The surface SEM images of Co/Ni(BDC)<sub>2</sub>TED@CF with different cycles: (a, b) 5 cycles; (c, d) 10 cycles; (e, f) 20 cycles; (g, h) 30 cycles; (i, j) 40 cycles; (k, l) 50 cycles.

---

**Figure S23.** The cross-sectional SEM images of Co/Ni(BDC)<sub>2</sub>TED@CF with different cycles: (a) (b) 5 cycles; (c) (d) 10 cycles; (e) (f) 20 cycles; (g) (h) 30 cycles; (i) (j) 40 cycles; (k) (l) 50 cycles.

---

**Figure S24.** The curves of the thickness versus preparation cycles.

---

**Figure S25.** CVs of Co/Ni(BDC)<sub>2</sub>TED@CF with different thickness at the different scan rates

---

---

from 10-100 mV s<sup>-1</sup> in the potential range of 0.01-0.1 V vs Ag/AgCl: (a) 5 cycles; (b) 10 cycles; (c) 20 cycles; (d) 30 cycles; (e) 40 cycles; (f) 50 cycles.

---

**Figure S26.** Capacitive current at 0.06 V vs Ag/AgCl for Co/Ni(BDC)<sub>2</sub>TED@CF with different thickness.

---

**Figure S27.** The ECSA normalized LSV curves of Co/Ni(BDC)<sub>2</sub>TED@CF with different thickness.

---

**Figure S28.** The SEM EDS date of Co/Ni(BDC)<sub>2</sub>TED@CF with a Co/Ni ratio of 1/1.5(Cu is from Cu foam).

---

**Figure S29.** The SEM EDS date of Co/Ni(BDC)<sub>2</sub>TED@CF with a Co/Ni ratios of 1/0.5(Cu is from Cu foam).

---

**Figure S30.** The SEM EDS date of Co/Ni(BDC)<sub>2</sub>TED@CF with a Co/Ni ratios of 1/1(Cu is from Cu foam).

---

**Figure S31.** The SEM mapping in Co/Ni(BDC)<sub>2</sub>TED@CF with a Co/Ni ratios of 1/1.5.

---

**Figure S32.** The SEM mapping in Co/Ni(BDC)<sub>2</sub>TED@CF with a Co/Ni ratios of 1/0.5.

---

**Figure S33.** The SEM mapping in Co/Ni(BDC)<sub>2</sub>TED@CF with a Co/Ni ratios of 1/1.

---

**Figure S34.** (a) The polarization curves for Co/Ni(BDC)<sub>2</sub>TED@CF with different Co/Ni ratios; (b) The overpotential of Co/Ni(BDC)<sub>2</sub>TED@CF with different Co/Ni ratios at the current density of 50 mA cm<sup>-2</sup>; (c) The EIS curves; (d) The Tafel plots from the LSV curves.

---

**Figure S35.** CVs of Co/Ni(BDC)<sub>2</sub>TED@CF with different Co/Ni ratios at the different scan rates from 10-100 mV s<sup>-1</sup> in the potential range of 0.01-0.1 V vs Ag/AgCl: (a) Co/Ni(1/05); (b) Co/Ni(1/1); (c) Co/Ni(1/1.5) and (d) Capacitive current at 0.06 V vs Ag/AgCl.

---

**Table S2.** The ICP dates of Co/Ni ratios in Co/Ni(BDC)<sub>2</sub>TED@CF with different Co/Ni ratios.

---

**Figure S36.** The DFT calculation model of OER process on metal sites in the structure of Co<sub>2</sub>(BDC)<sub>2</sub>TED with [001] orientation.

---

**Figure S37.** The DFT calculation model of OER process on metal sites in the structure of

---

---

Ni<sub>2</sub>(BDC)<sub>2</sub>TED with [001] orientation.

---

**Figure S38.** The diagrammatic graph of OER process in Co/Ni(BDC)<sub>2</sub>TED nanosheets.

---

**Figure S39.** The Gibbs free energy changes of Co/Ni(BDC)<sub>2</sub>TED nanosheets with two different models.

---

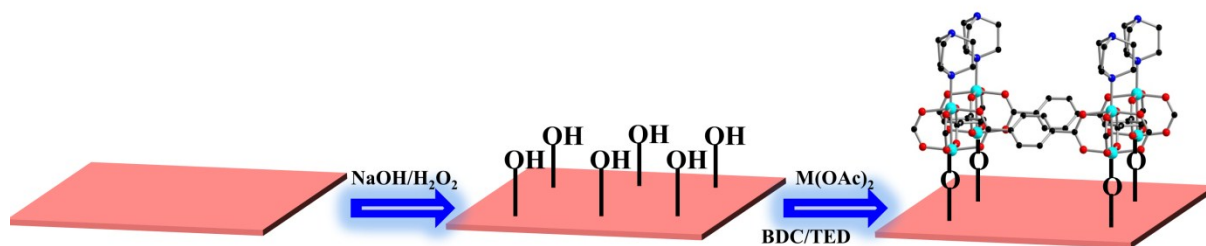

**Scheme S1.** Schematic illustration of the formation of  $M_2(BDC)_2TED$  on the substrate.

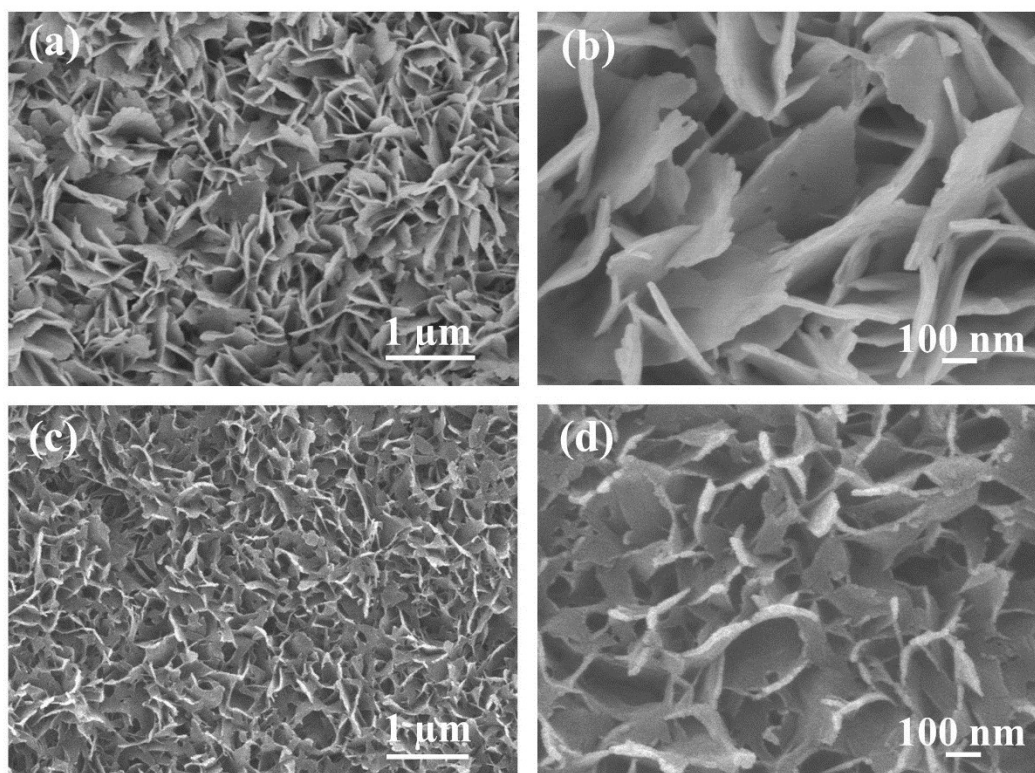

**Figure S1.** The surface SEM images of  $M_2(BDC)_2TED$  MOF grown on the Cu foil: (a) (b)  $Co_2(BDC)_2TED$ ; (c) (d)  $Ni_2(BDC)_2TED$ .

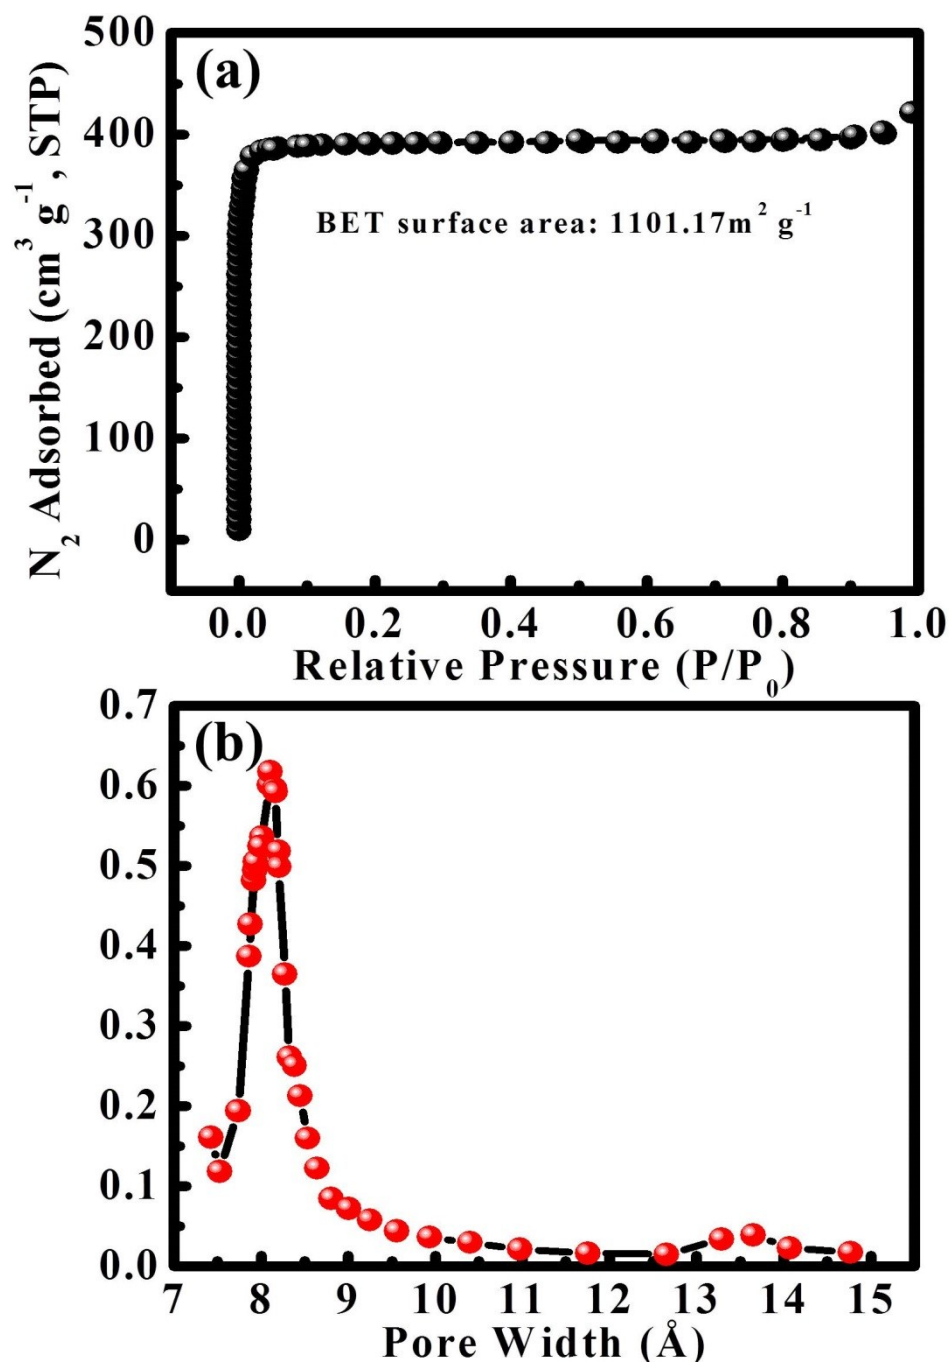

**Figure S2.** (a) N<sub>2</sub> adsorption isotherm and (b) pore size distribution of Co/Ni(BDC)<sub>2</sub>TED nanosheets stripped from Cu foam.

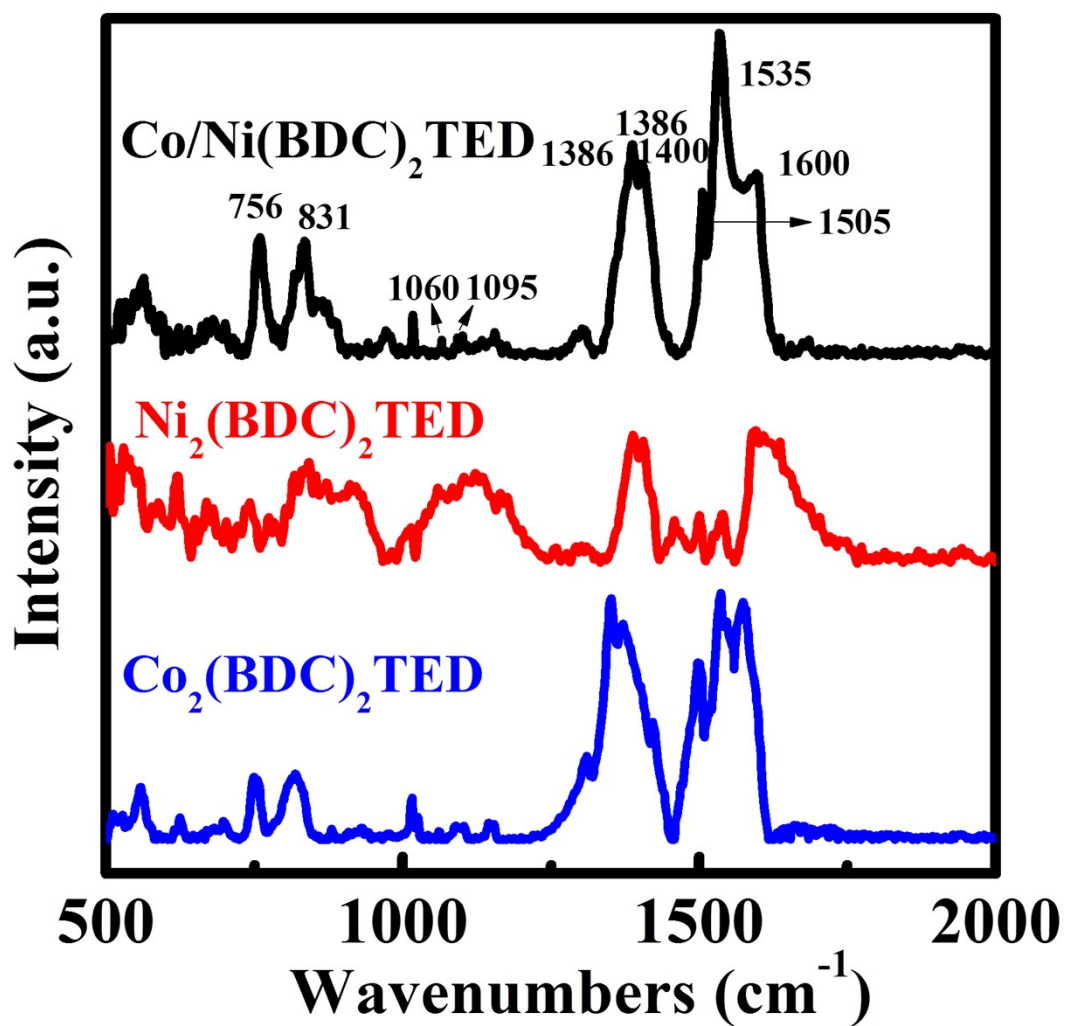

**Figure S3.** The IR spectrum of Co<sub>2</sub>(BDC)<sub>2</sub>TED, Ni<sub>2</sub>(BDC)<sub>2</sub>TED and Co/Ni(BDC)<sub>2</sub>TED nanosheets stripped from Cu foam.



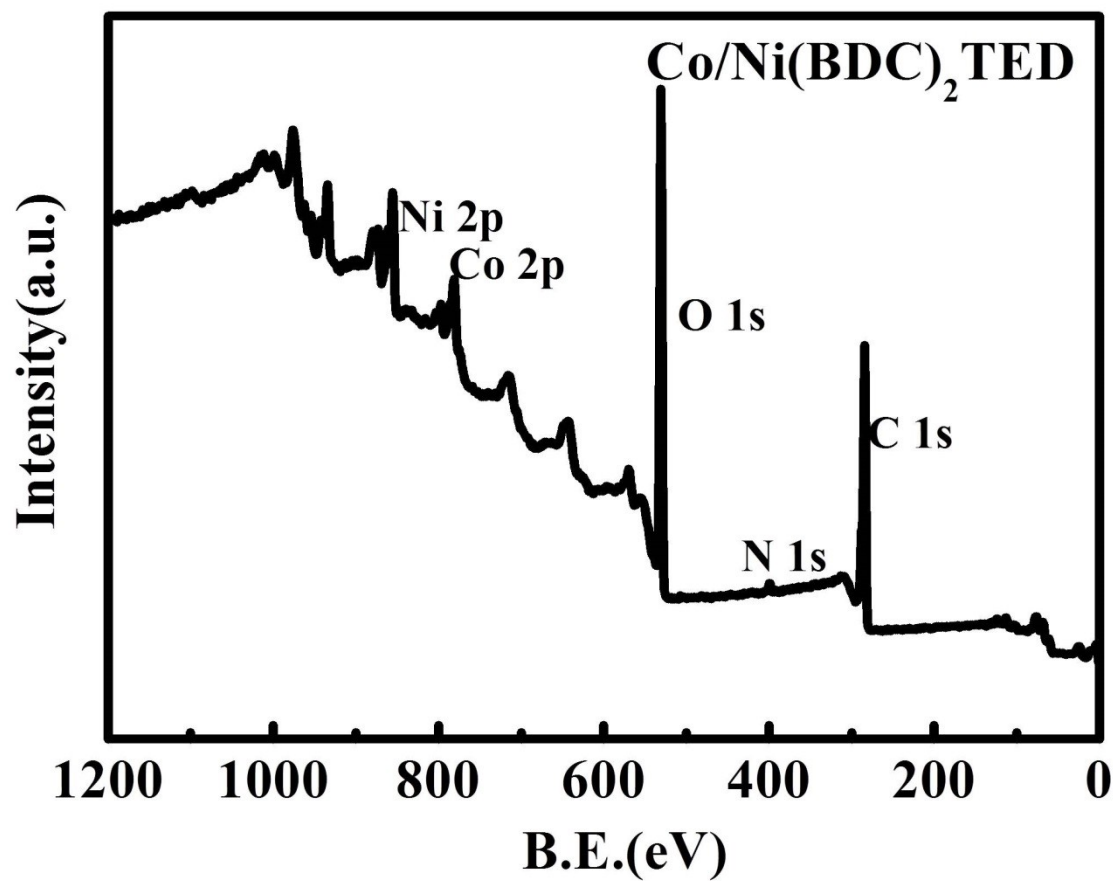

Figure S4. The XPS survey of Co/Ni(BDC)<sub>2</sub>TED@CF.

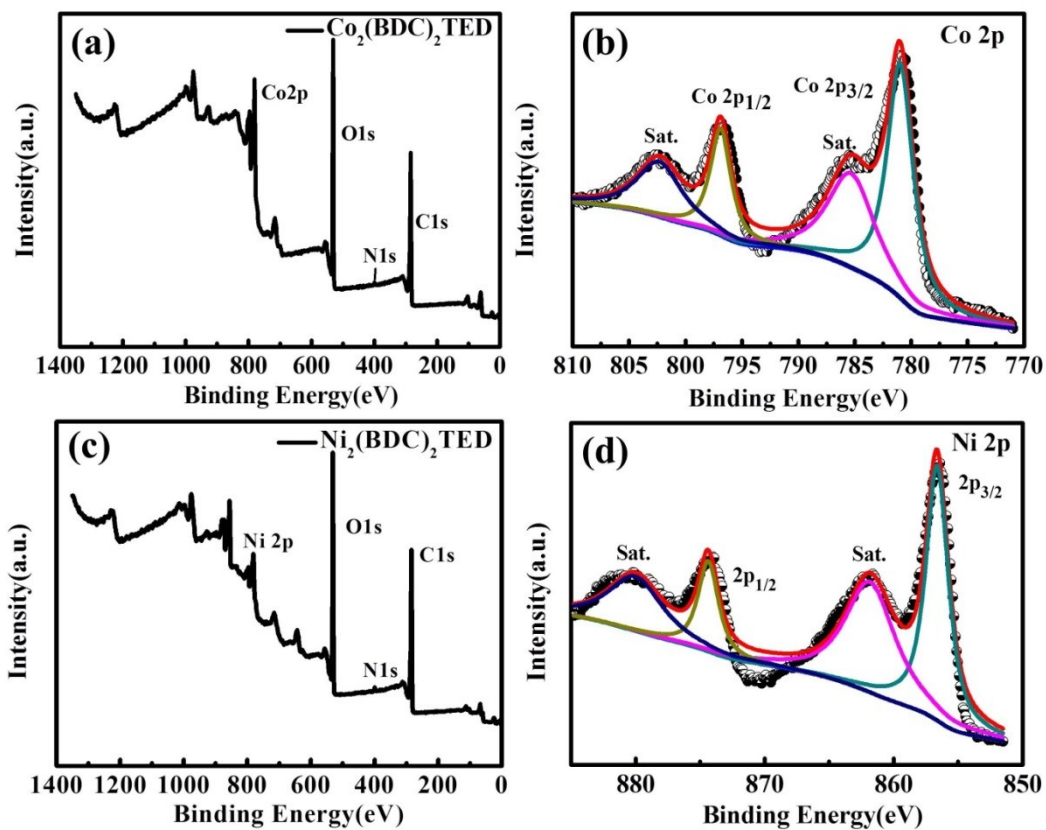

**Figure S5.** The XPS results: (a) (b)  $\text{Co}_2(\text{BDC})_2\text{TED}@CF$ ; (c) (d)  $\text{Ni}_2(\text{BDC})_2\text{TED}@CF$ .

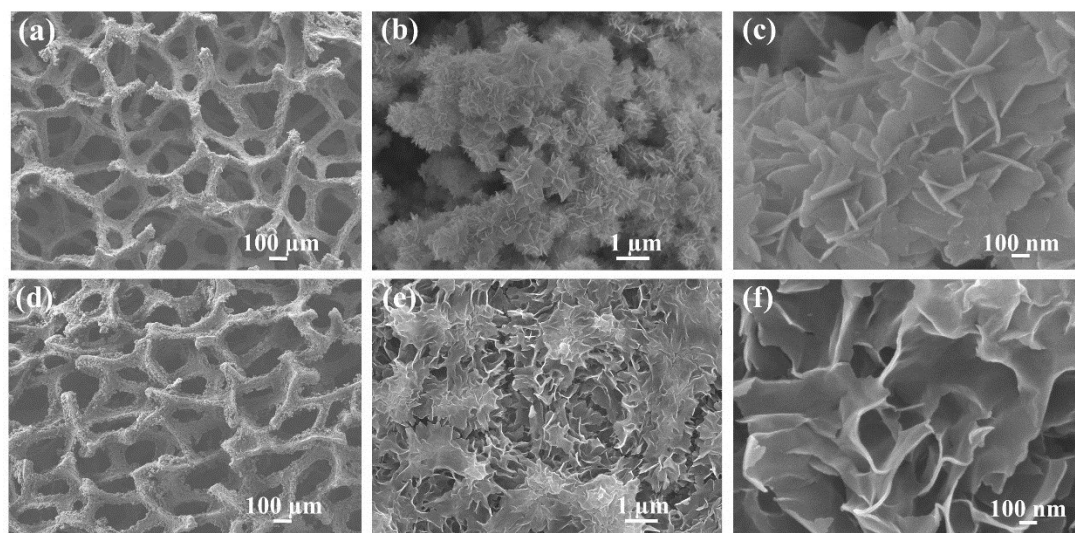

**Figure S6.** The surface SEM images of  $\text{M}_2(\text{BDC})_2\text{TED}$  MOF grown on the Cu foam: (a, b, c)  $\text{Co}_2(\text{BDC})_2\text{TED}@CF$ ; (d, e, f)  $\text{Ni}_2(\text{BDC})_2\text{TED}@CF$ .

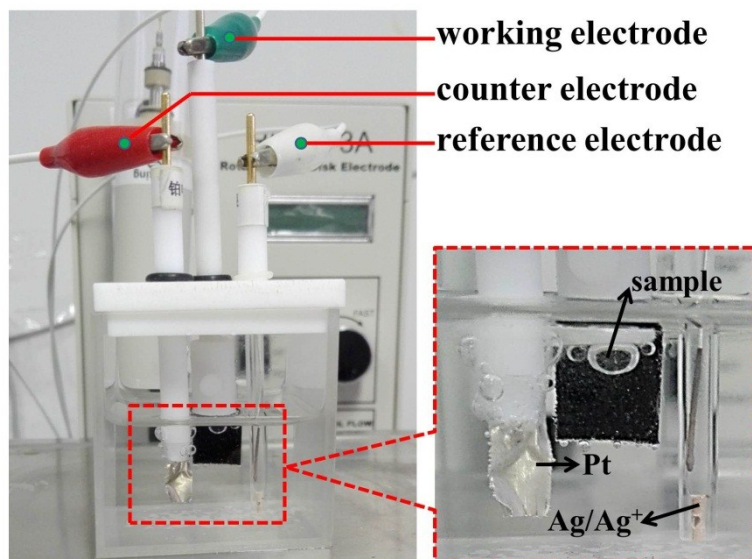

**Figure S7.** The setup of electrochemical measurement.

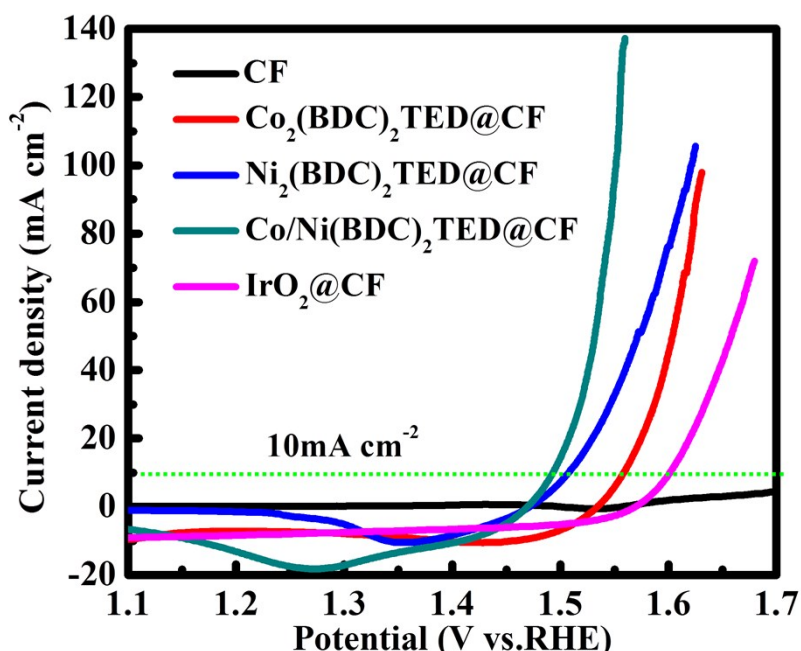

**Figure S8.** LSV curves in the reverse sweep direction.

The presence of strong oxidation peaks of  $\text{Ni}^{2+}$  to  $\text{Ni}^{3+}$  in LSV curves of the catalysis (Figure 3a), so we can obtain the overpotentials at the current density of  $10 \text{ mA cm}^{-2}$  in the LSV curves by the reverse sweep direction. As shown in Figure S8,  $\text{Co/Ni(BDC)}_2\text{TED@CF}$  required the lowest overpotential of only 260 mV to reach the current density of  $10 \text{ mA cm}^{-2}$ , while the overpotentials of about 276, 327 and 380 mV were required to reach the current density of  $10 \text{ mA cm}^{-2}$  for  $\text{Ni}_2(\text{BDC})_2\text{TED@CF}$ ,  $\text{Co}_2(\text{BDC})_2\text{TED@CF}$  and  $\text{IrO}_2\text{@CF}$ , respectively. This order is consistent with those at the current density of  $50 \text{ mA cm}^{-2}$ , indicating the excellent OER activity of  $\text{Co/Ni(BDC)}_2\text{TED@CF}$ .

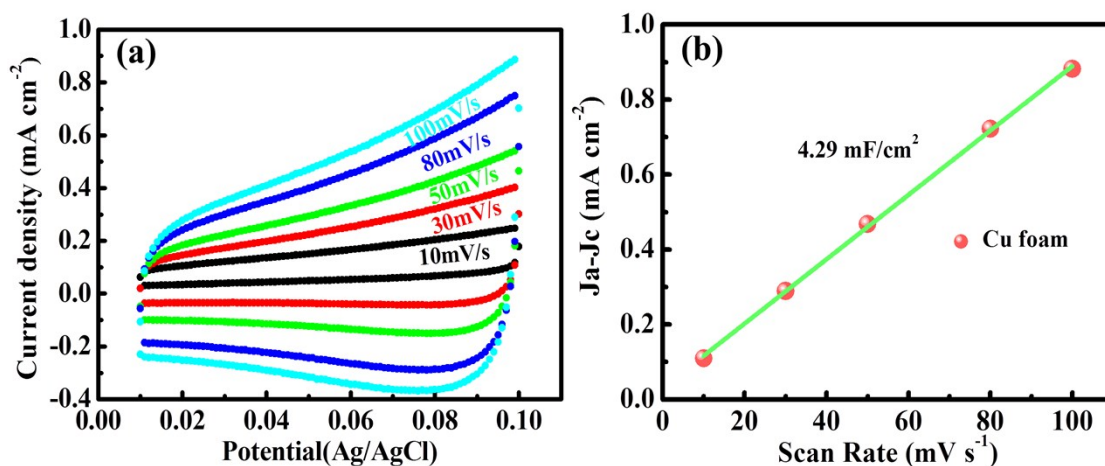

**Figure S9.** (a) CVs of bare Cu foam at the different scan rates from 10-100  $\text{mV s}^{-1}$  in the potential range of 0.01-0.1 V vs Ag/AgCl and (b) Capacitive current at 0.06 V vs Ag/AgCl.

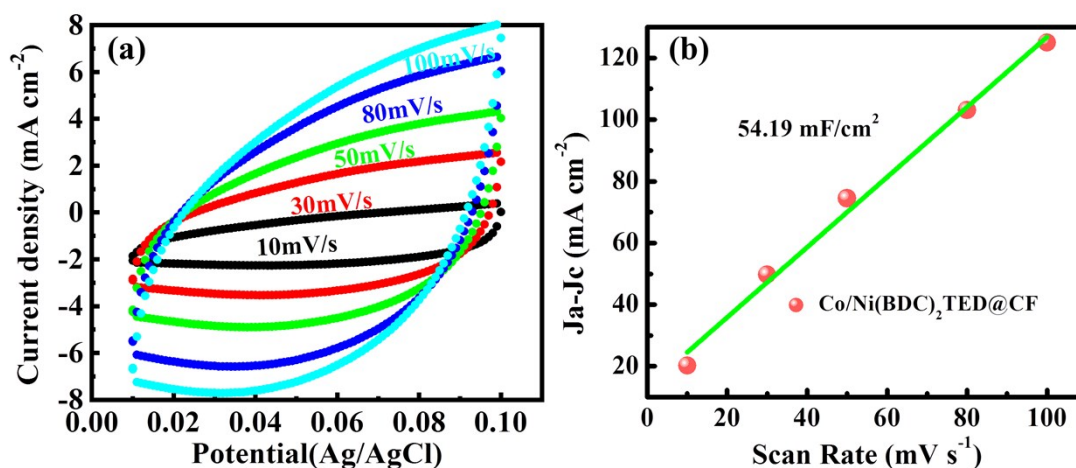

**Figure S10.** (a) CVs of Co/Ni(BDC)<sub>2</sub>TED@CF at the different scan rates from 10-100  $\text{mV s}^{-1}$  in the potential range of 0.01-0.1 V vs Ag/AgCl and (b) Capacitive current at 0.06 V vs Ag/AgCl.

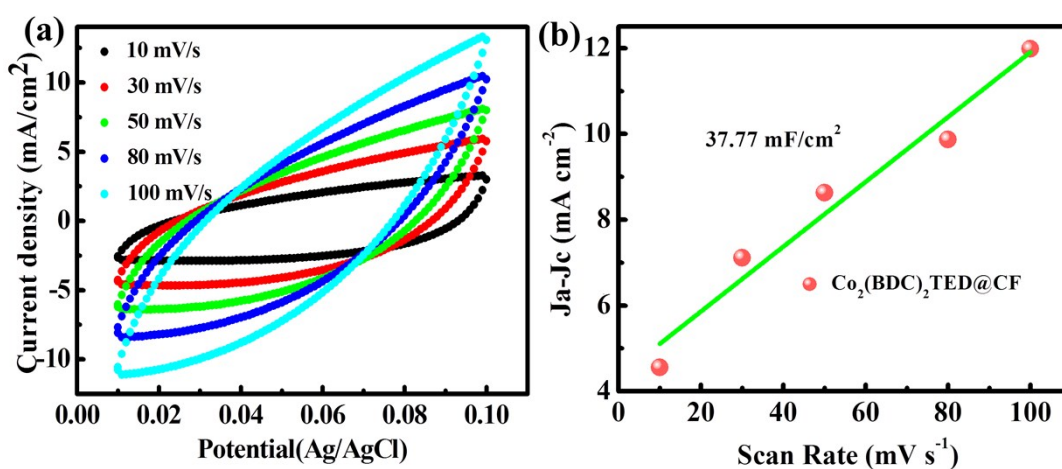

**Figure S11.** (a) CVs of Co<sub>2</sub>(BDC)<sub>2</sub>TED@CF at the different scan rates from 10-100  $\text{mV s}^{-1}$  in the potential range of 0.01-0.1 V vs Ag/AgCl and (b) Capacitive current at 0.06 V vs Ag/AgCl.



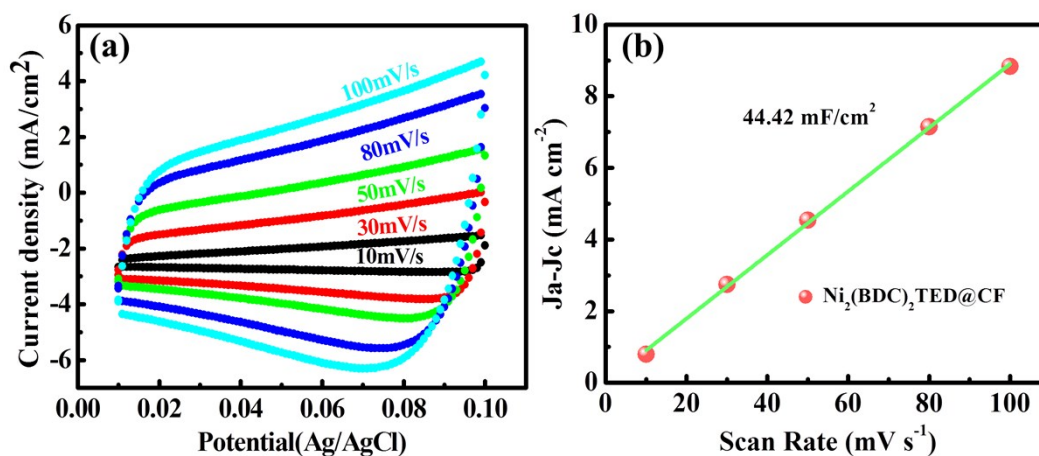

**Figure S12.** (a) CVs of  $\text{Ni}_2(\text{BDC})_2\text{TED@CF}$  at the different scan rates from 10-100  $\text{mV s}^{-1}$  in the potential range of 0.01-0.1 V vs Ag/AgCl and (b) Capacitive current at 0.06 V vs Ag/AgCl.

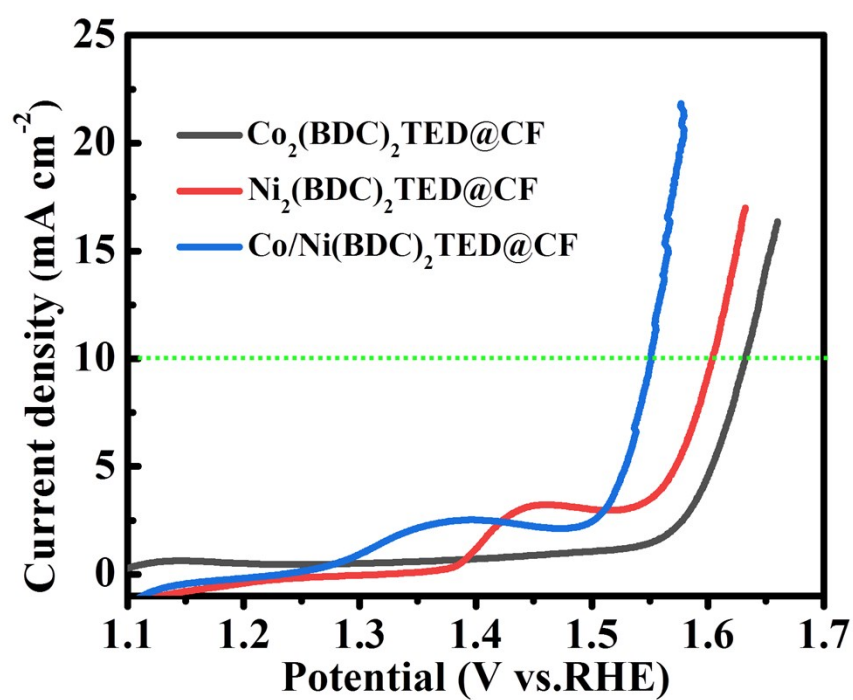

**Figure S13.** The ECSA normalized LSV curves.

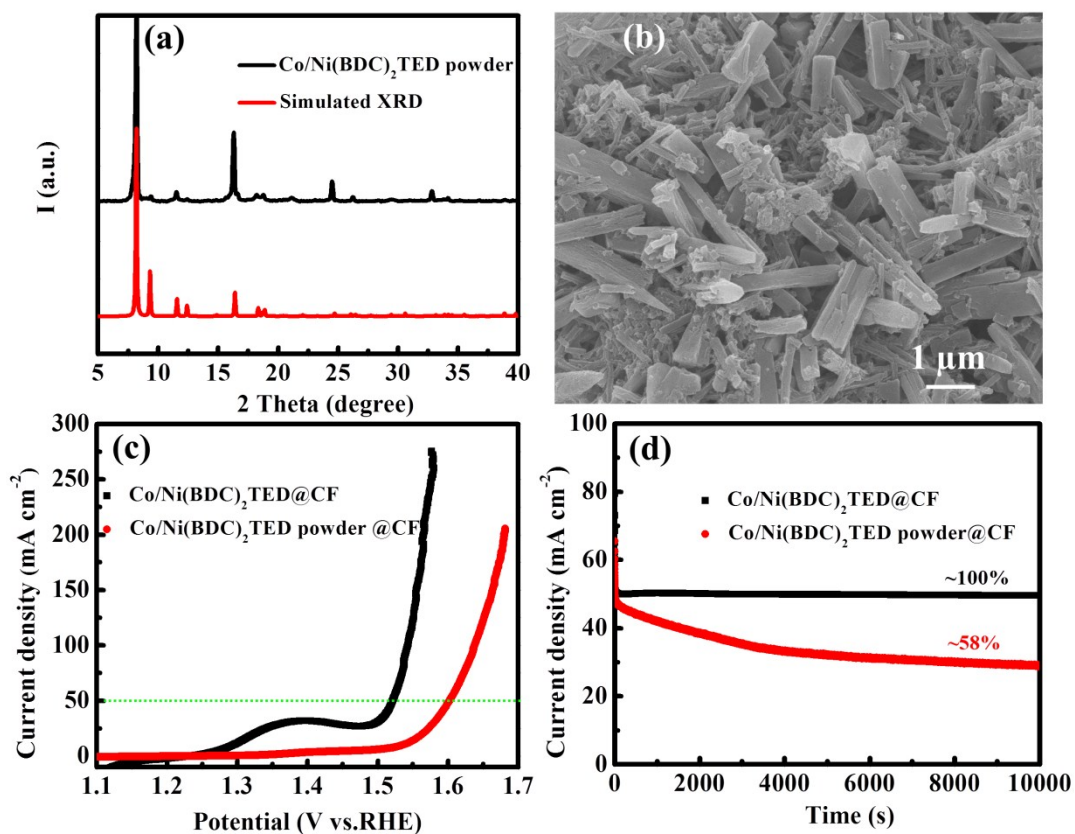

**Figure S14.** (a) The XRD of Co/Ni(BDC)<sub>2</sub>TED powder; (b) The SEM image of Co/Ni(BDC)<sub>2</sub>TED powder deposited on Cu foam; (c) The LSV curves of Co/Ni(BDC)<sub>2</sub>TED deposited on Cu foam and Co/Ni(BDC)<sub>2</sub>TED@CF; (d) Chronopotentiometric curves of Co/Ni(BDC)<sub>2</sub>TED deposited on Cu foam and Co/Ni(BDC)<sub>2</sub>TED@CF.

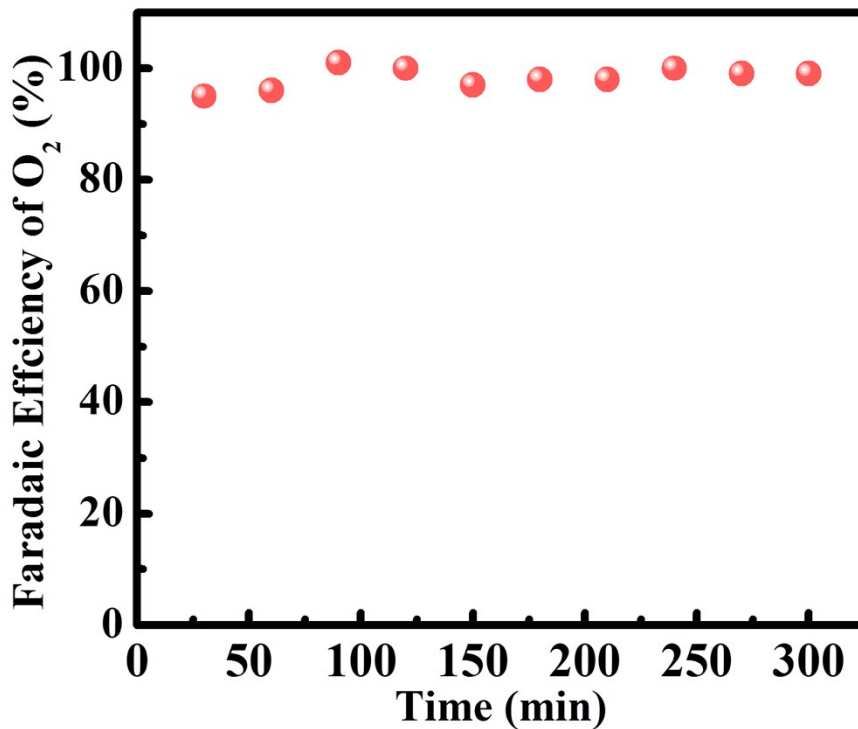

**Figure S15.** Faradaic efficiency for Co/Ni(BDC)<sub>2</sub>TED@CF at the current density of 50 mA cm<sup>-2</sup>.

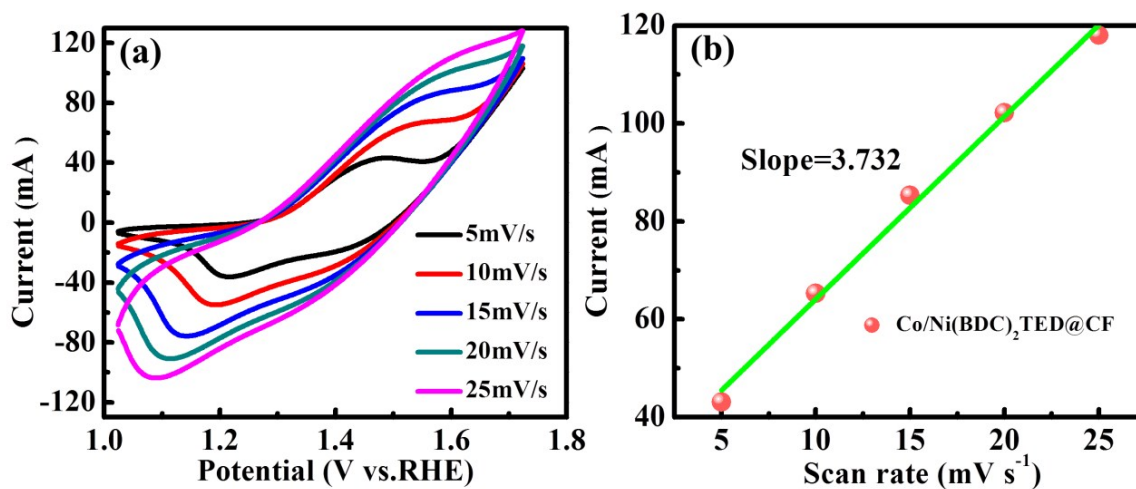

**Figure S16.** (a) CV of Co/Ni(BDC)<sub>2</sub>TED@CF at different scan rates of 5, 10, 15, 20, and 25 mV s<sup>-1</sup> in 1.0 M KOH and (b) the linear relationship of the oxidation peak currents vs. scan rates for the Co/Ni(BDC)<sub>2</sub>TED@CF.

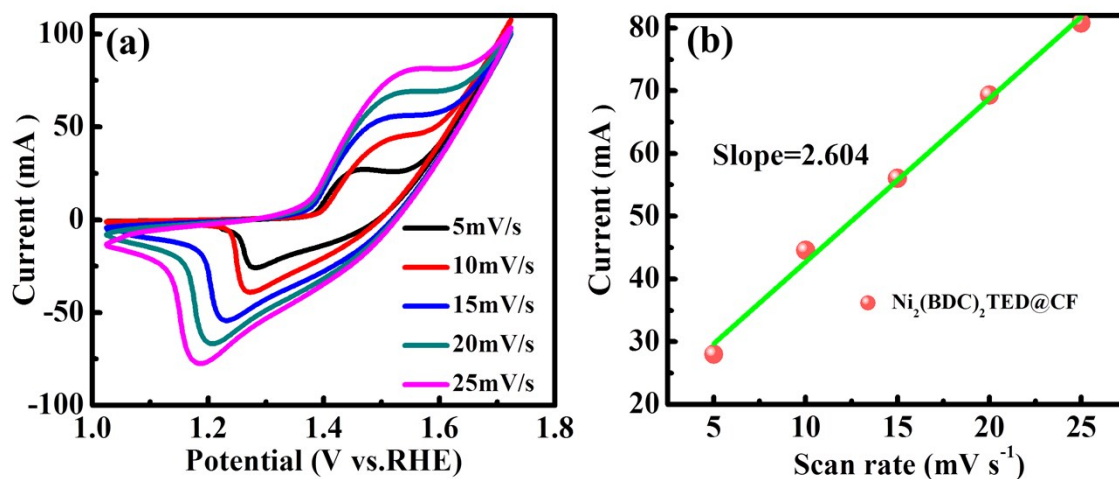

**Figure S17.** (a) CV of  $\text{Ni}_2(\text{BDC})_2\text{TED@CF}$  at different scan rates of 5, 10, 15, 20, and 25  $\text{mV s}^{-1}$  in 1.0 M KOH and (b) the linear relationship of the oxidation peak currents vs. scan rates for the  $\text{Ni}_2(\text{BDC})_2\text{TED@CF}$ .

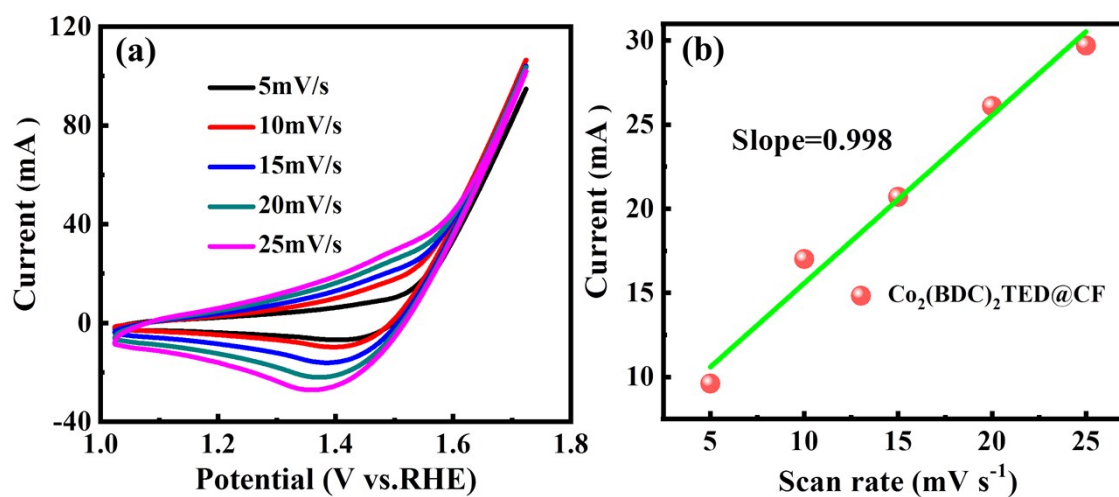

**Figure S18.** (a) CV of  $\text{Co}_2(\text{BDC})_2\text{TED@CF}$  at different scan rates of 5, 10, 15, 20, and 25  $\text{mV s}^{-1}$  in 1.0 M KOH and (b) the linear relationship of the oxidation peak currents vs. scan rates for the  $\text{Co}_2(\text{BDC})_2\text{TED@CF}$ .



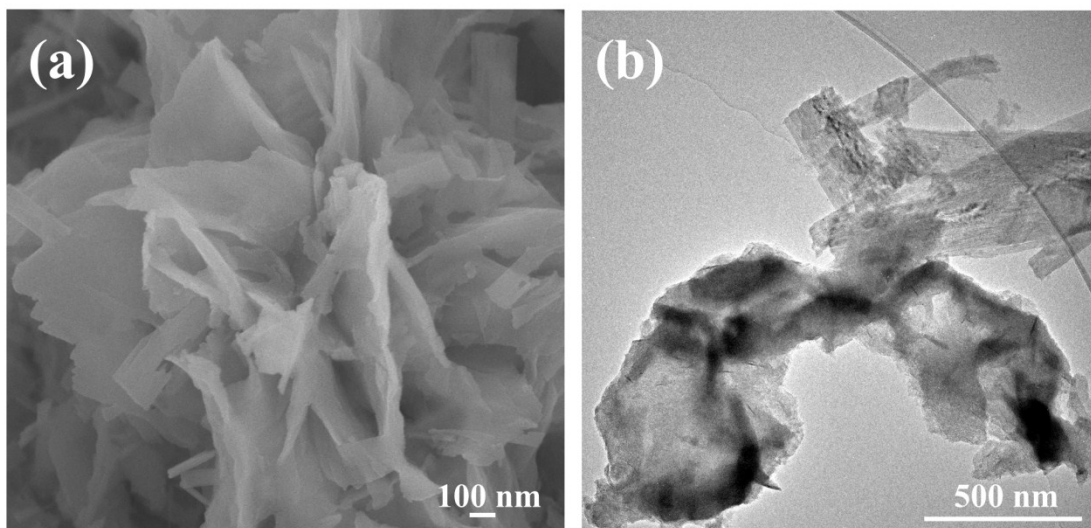

**Figure S19.** (a) The SEM image of Co/Ni(BDC)<sub>2</sub>TED@CF after the electrochemical testing and (b) The TEM images of Co/Ni(BDC)<sub>2</sub>TED@CF after the electrochemical testing.

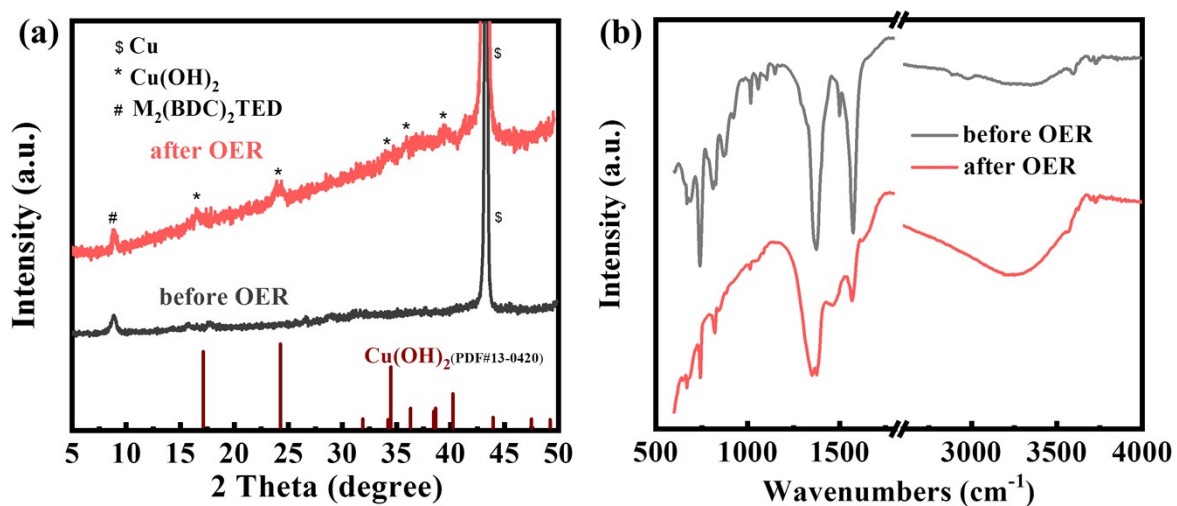

**Figure S20.** (a) The XRD and (b) IR of Co/Ni(BDC)<sub>2</sub>TED@CF after the electrochemical testing.

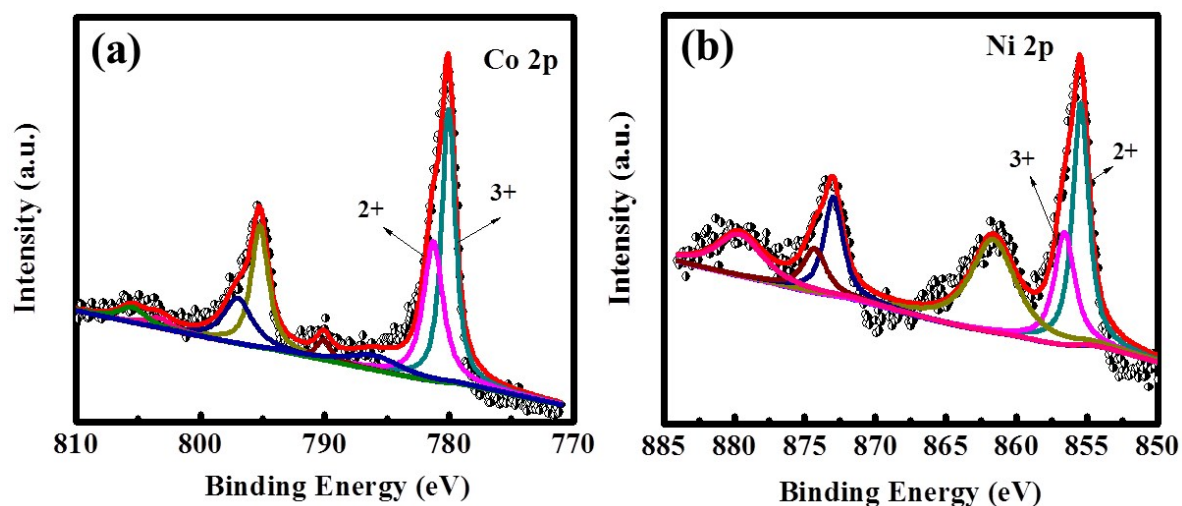

**Figure S21.** The XPS results of Co/Ni(BDC)<sub>2</sub>TED@CF after OER test.

**Table S1** Comparison of Electrocatalytic Performances of Various Materials

| Catalyst                                  | Medium     | Overpotential (10 mA/cm <sup>2</sup> ) | Overpotential (50 mA/cm <sup>2</sup> ) | Tafel slope (mV dec <sup>-1</sup> ) | reference |
|-------------------------------------------|------------|----------------------------------------|----------------------------------------|-------------------------------------|-----------|
| Co/Ni(BDC) <sub>2</sub> TED@CF nanosheets | 1.0 M KOH  | 260 mV                                 | 287 mV                                 | 76.24                               | This work |
| Ni-MOF@Fe-MOF nanosheets                  | 1.0 M KOH  | 265 mV                                 | ~330 mV                                | 82                                  | 1         |
| Co-MOF NS/CC                              | 1.0 M KOH  | --                                     | 370 mV                                 | 106.6                               | 2         |
| Ti@TiO <sub>2</sub> /CdS/ZIF-67           | 1.0 M NaOH | 410 mV                                 | ~640 mV                                | 42                                  | 3         |
| NiFe-UMNs                                 | 1.0 M KOH  | 260 mV                                 | ~290 mV                                | 30                                  | 4         |
| NiFe-MOF array                            | 0.1 M KOH  | 240 mV                                 | ~390 mV                                | 34                                  | 5         |
| NiCu-MOFNs/NF                             | 1.0 M KOH  | --                                     | ~280 mV                                | 47.9                                | 6         |

1. K. Rui, G. Zhao, Y. Chen, Y. Lin, Q. Zhou, J. Chen, J. Zhu, W. Sun, W. Huang and S. X. Dou, *Adv. Funct. Mater.*, 2018, **28**, 1801554.
2. Z. Wei, W. Zhu, Y. Li, Y. Ma, J. Wang, N. Hu, Y. Suo and J. Wang, *Inorg. Chem.*, 2018, **57**, 8422-8428.
3. T. Zhang, J. Du, H. Zhang and C. Xu, *Electrochim. Acta*, 2016, **219**, 623-629.
4. G. Hai, X. Jia, K. Zhang, X. Liu, Z. Wu and G. Wang, *Nano Energy*, 2018, **44**, 345-352.

5. J. Duan, S. Chen and C. Zhao, *Nat. Commun.*, 2017, **8**, 15341.
6. X. Zheng, X. Song, X. Wang, Z. Zhang, Z. Sun and Y. Guo, *New J. Chem.*, 2018, **42**, 8346-8350.

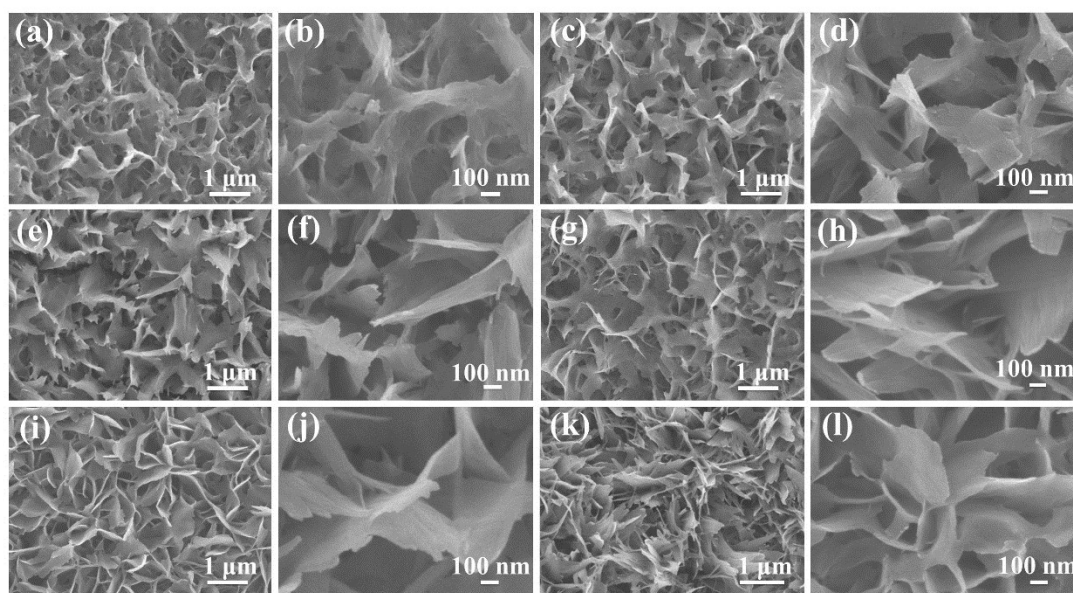

**Figure S22.** The surface SEM images of Co/Ni(BDC)<sub>2</sub>TED@CF with different cycles: (a, b) 5 cycles; (c, d) 10 cycles; (e, f) 20 cycles; (g, h) 30 cycles; (i, j) 40 cycles; (k, l) 50 cycles.

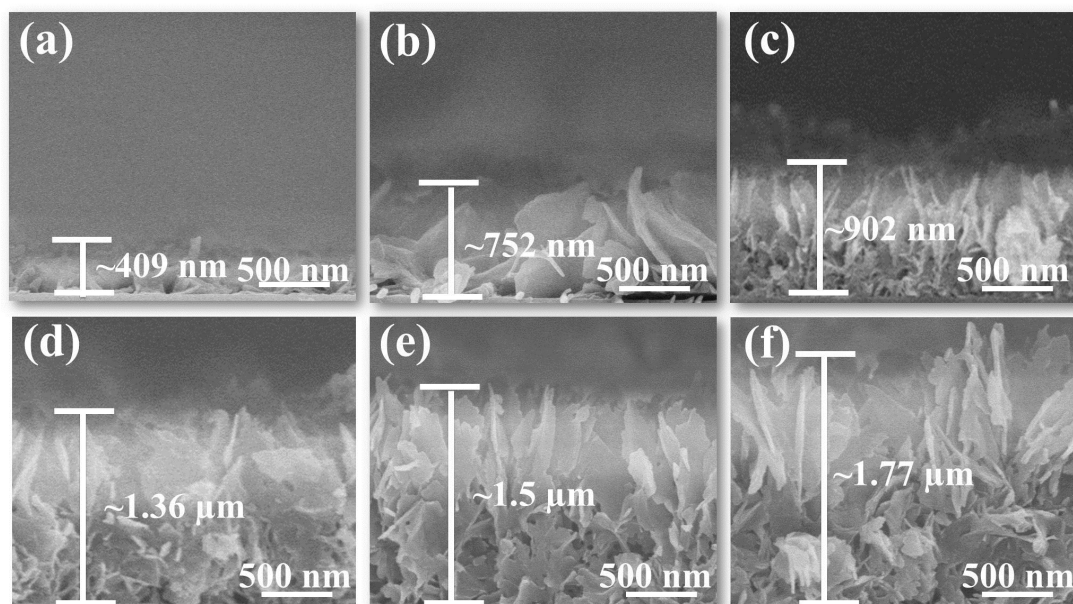

**Figure S23.** The cross-sectional SEM images of Co/Ni(BDC)<sub>2</sub>TED@CF with different cycles: (a) (b) 5 cycles; (c) (d) 10 cycles; (e) (f) 20 cycles; (g) (h) 30 cycles; (i) (j) 40 cycles; (k) (l) 50 cycles.

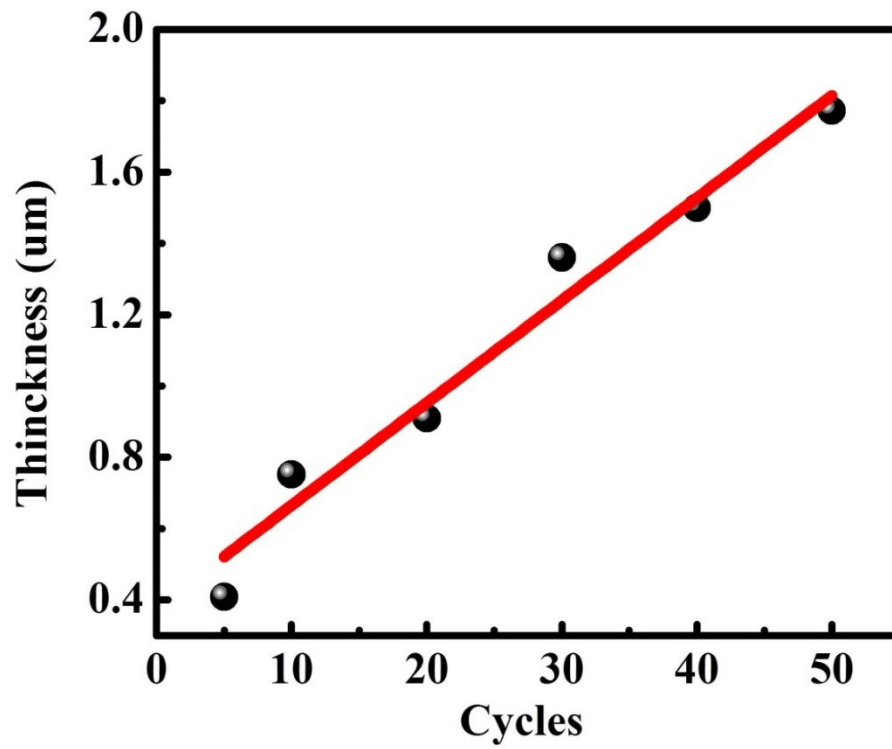

**Figure S24.** The curves of the thickness versus preparation cycles.



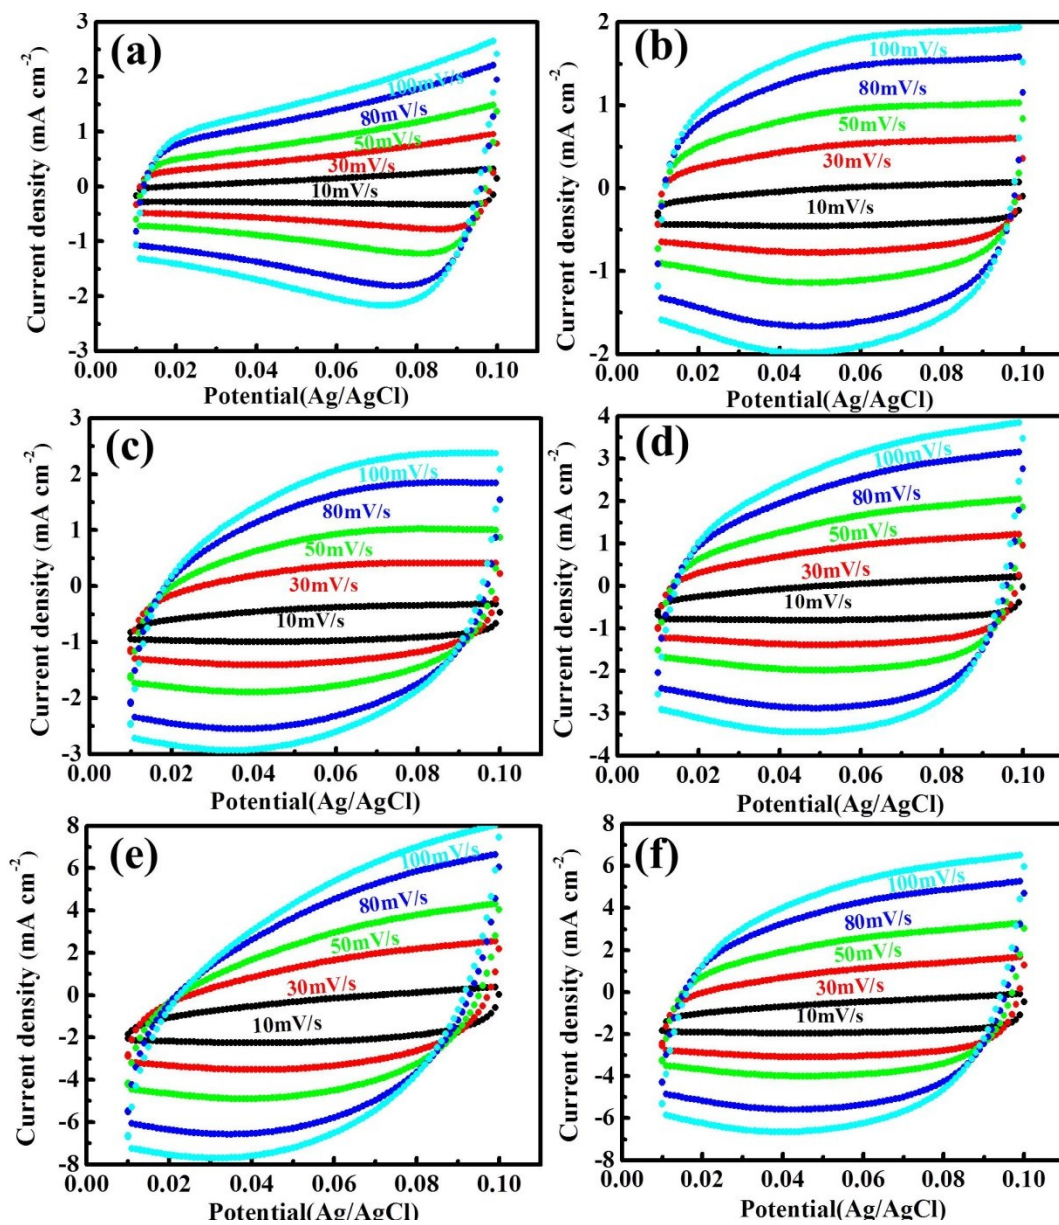

**Figure S25.** CVs of Co/Ni(BDC)<sub>2</sub>TED@CF with different thickness at the different scan rates from 10-100 mV s<sup>-1</sup> in the potential range of 0.01-0.1 V vs Ag/AgCl: (a) 5 cycles; (b) 10 cycles; (c) 20 cycles; (d) 30 cycles; (e) 40 cycles; (f) 50 cycles.

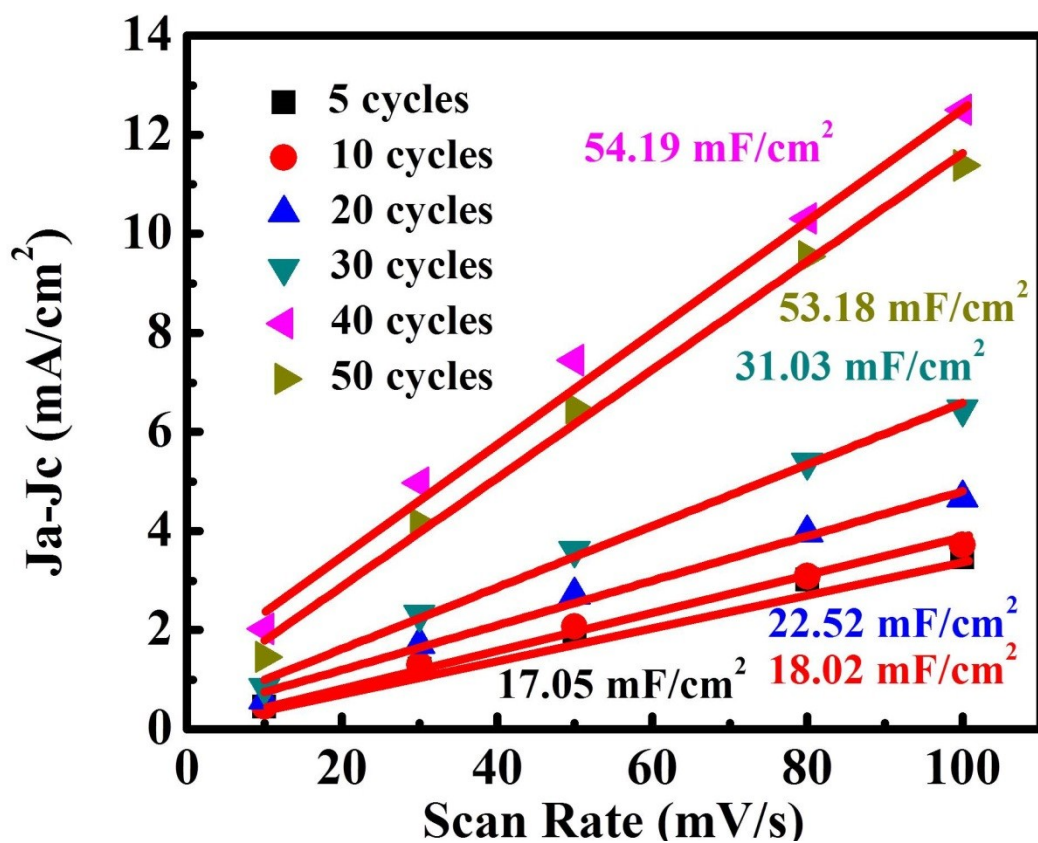

Figure S26. Capacitive current at 0.06 V vs Ag/AgCl for Co/Ni(BDC)<sub>2</sub>TED@CF with different thickness.

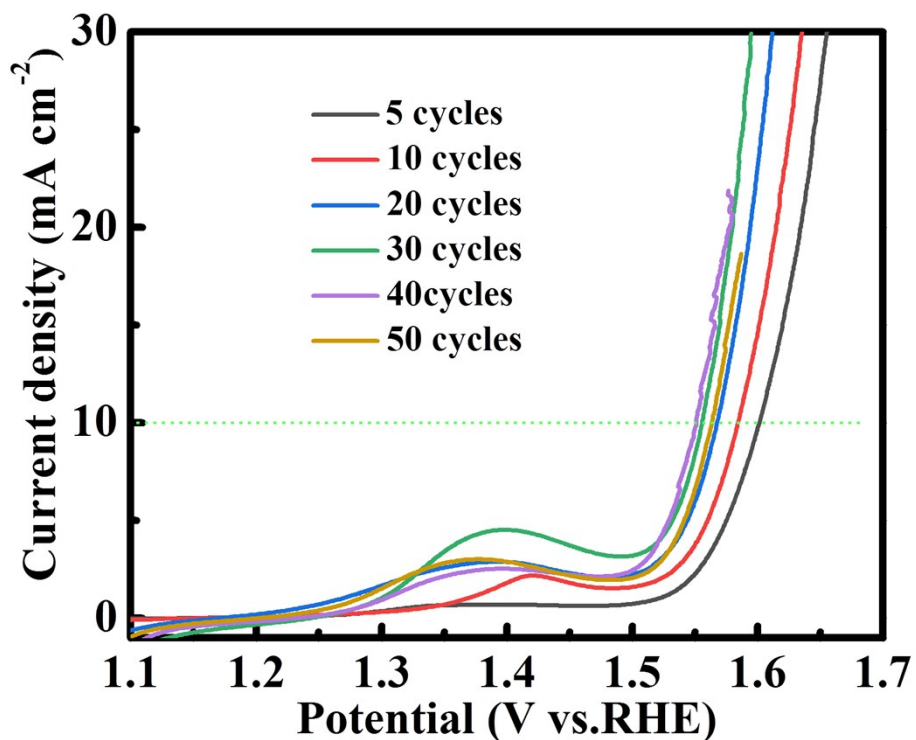

Figure S27. The ECSA normalized LSV curves of Co/Ni(BDC)<sub>2</sub>TED@CF with different thickness.

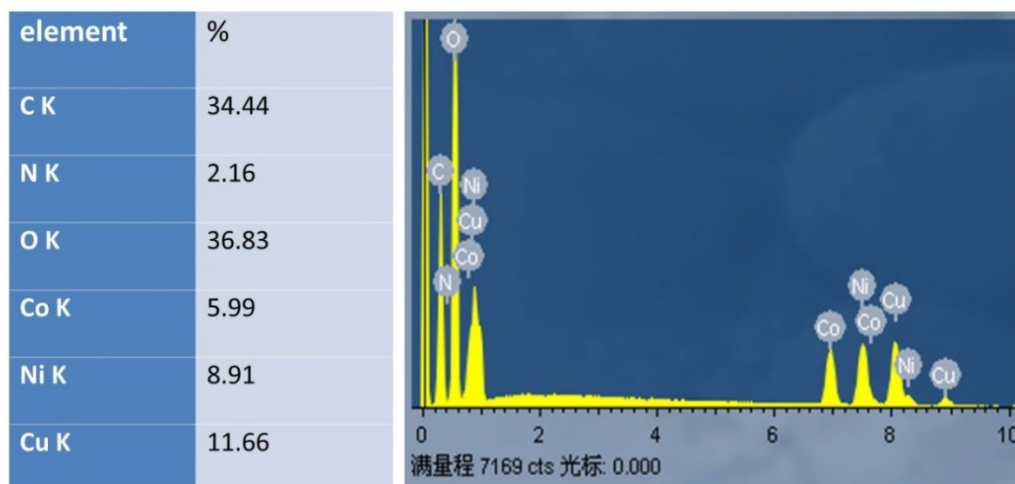

**Figure S28.** The SEM EDS date of Co/Ni(BDC)<sub>2</sub>TED@CF with a Co/Ni ratio of 1/1.5 (Cu is from Cu foam).

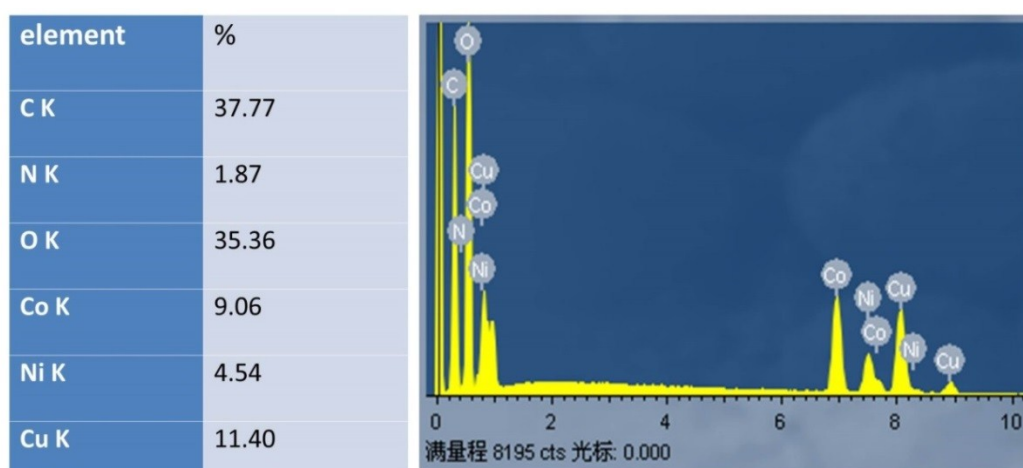

**Figure S29.** The SEM EDS date of Co/Ni(BDC)<sub>2</sub>TED@CF with a Co/Ni ratios of 1/0.5 (Cu is from Cu foam).

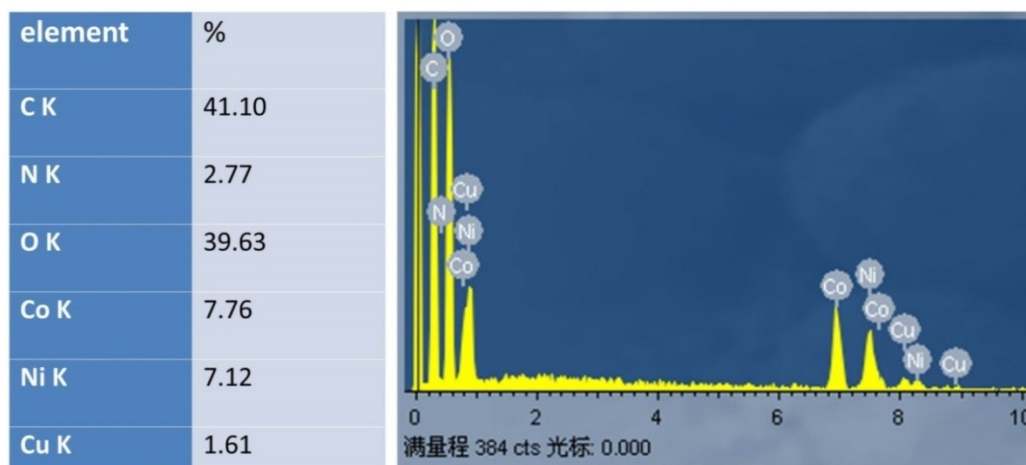

**Figure S30.** The SEM EDS date of Co/Ni(BDC)<sub>2</sub>TED@CF with a Co/Ni ratios of 1/1 (Cu is from Cu foam).



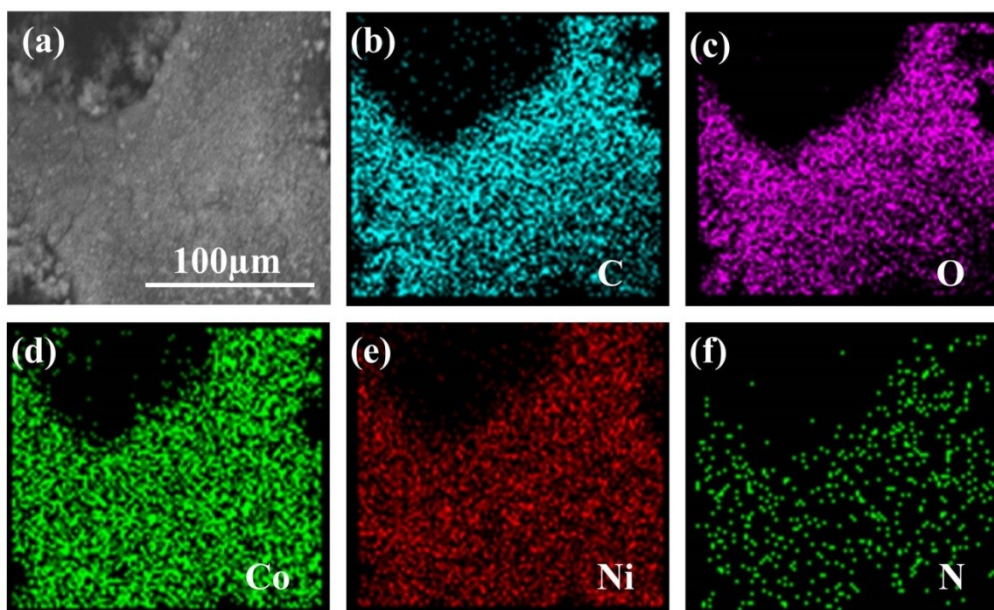

**Figure S31.** The SEM mapping in Co/Ni(BDC)<sub>2</sub>TED@CF with a Co/Ni ratios of 1/1.5.

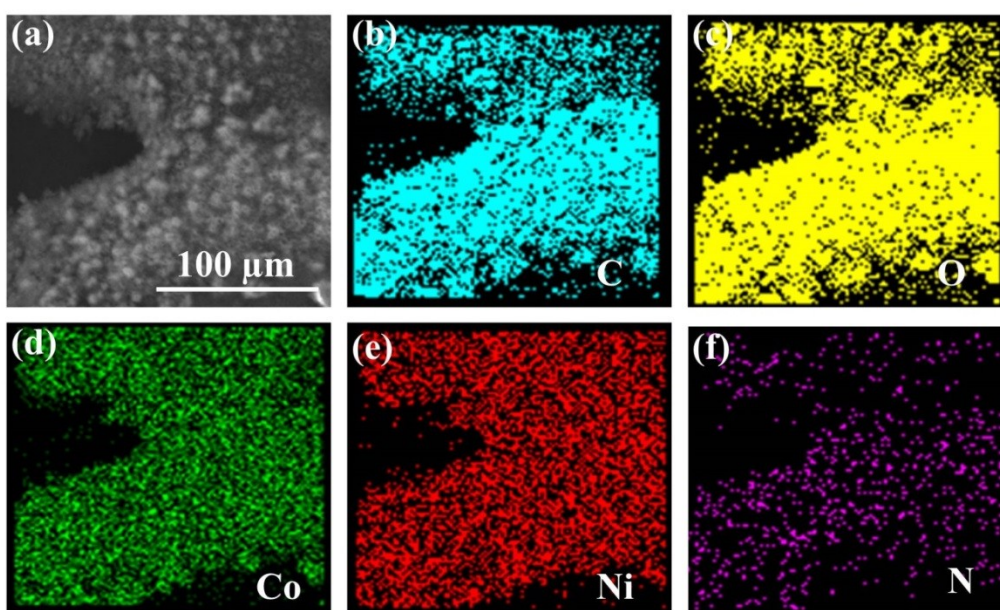

**Figure S32.** The SEM mapping in Co/Ni(BDC)<sub>2</sub>TED@CF with a Co/Ni ratios of 1/0.5.



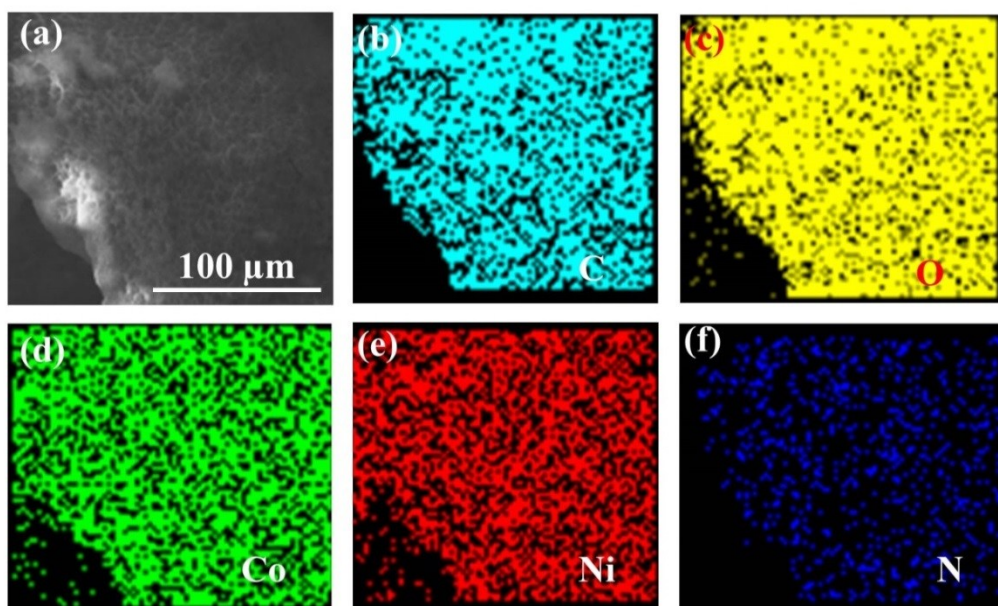

**Figure S33.** The SEM mapping in Co/Ni(BDC)<sub>2</sub>TED@CF with a Co/Ni ratios of 1/1.

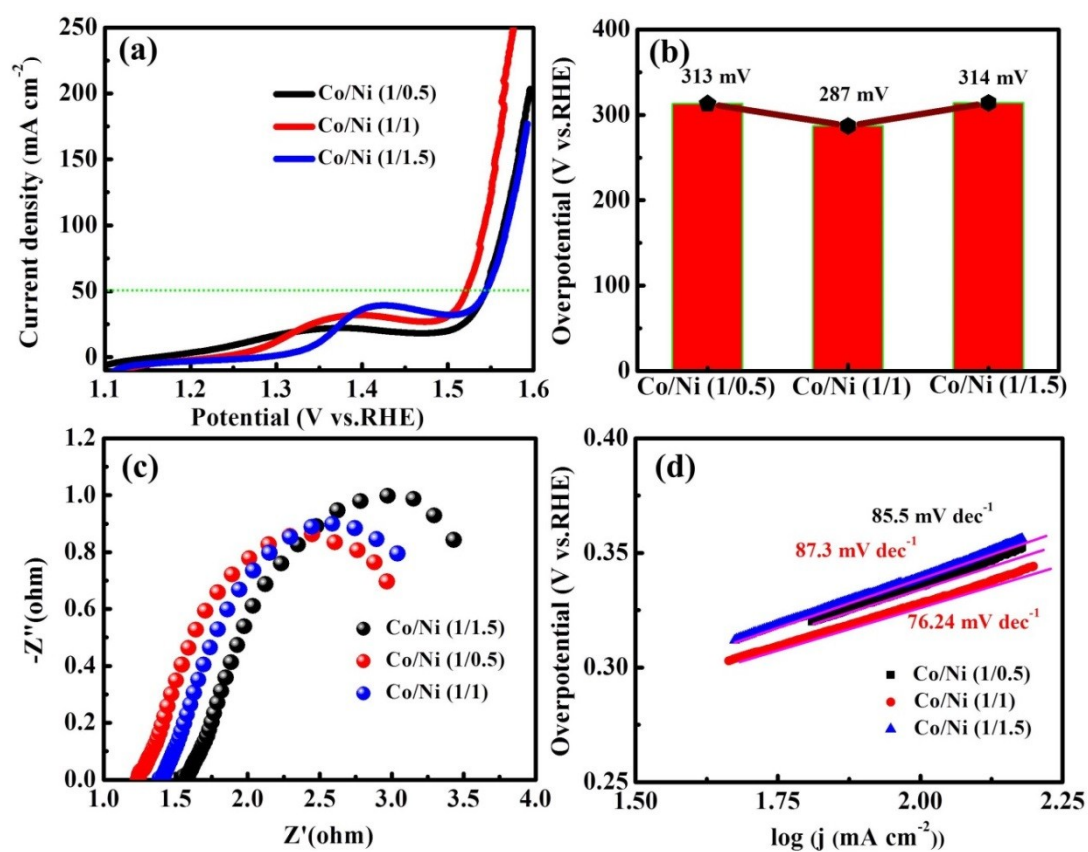

**Figure S34.** (a) The polarization curves for Co/Ni(BDC)<sub>2</sub>TED@CF with different Co/Ni ratios; (b) The overpotential of Co/Ni(BDC)<sub>2</sub>TED@CF with different Co/Ni ratios at the current density of 50 mA/cm<sup>2</sup>; (c) The EIS curves; (d) The Tafel plots from the LSV curves.

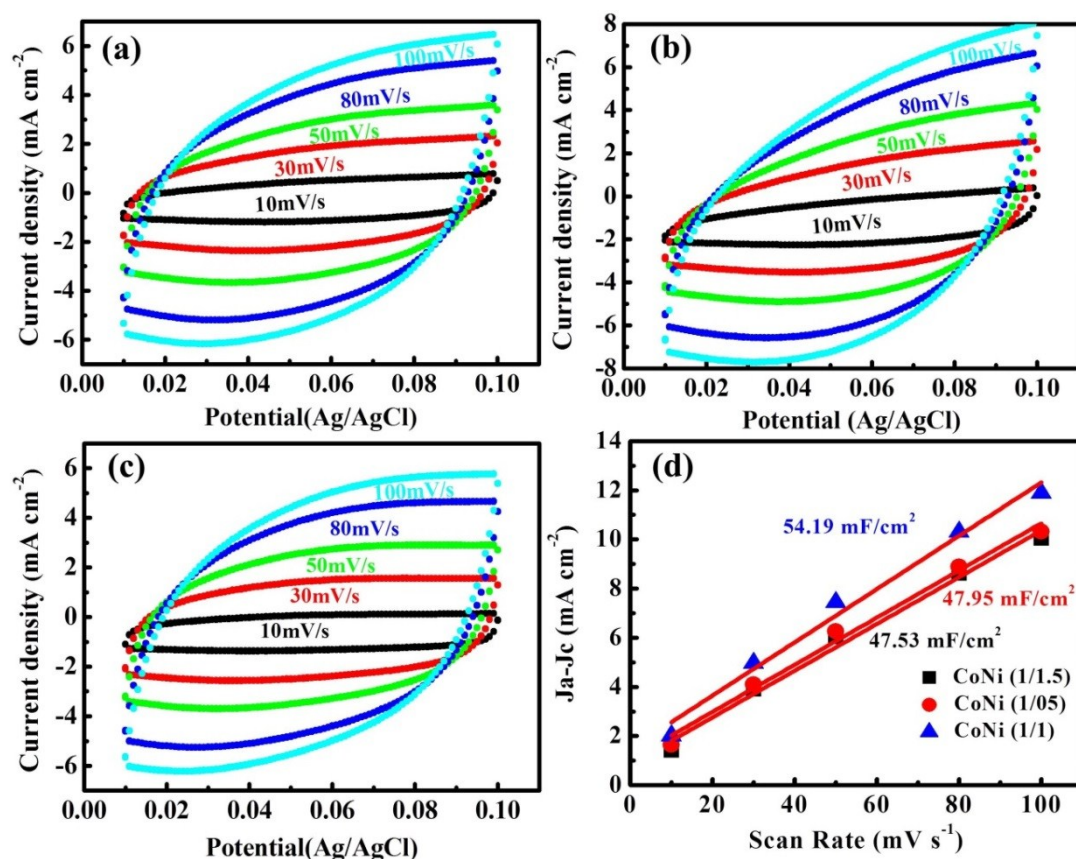

**Figure S35.** CVs of Co/Ni(BDC)<sub>2</sub>TED@CF with different Co/Ni ratios at the different scan rates from 10-100 mV s<sup>-1</sup> in the potential range of 0.01-0.1 V vs Ag/AgCl: (a) Co/Ni(1/0.5); (b) Co/Ni(1/1); (c) Co/Ni(1/1.5) and (d) Capacitive current at 0.06 V vs Ag/AgCl.

**Table S2.** The ICP dates of Co/Ni ratios in Co/Ni(BDC)<sub>2</sub>TED@CF with different Co/Ni ratios.

| Sample                                | concentration                                                  | ICP (Co/Ni) | ICP (Co/Ni) | Average Co/Ni ratio |
|---------------------------------------|----------------------------------------------------------------|-------------|-------------|---------------------|
| Co/Ni(BDC) <sub>2</sub> TED@CF(1/1.5) | Co(OAc) <sub>2</sub> (0.5 mM)<br>Ni(OAc) <sub>2</sub> (1.0 mM) | 17.51/27.3  | 17.09/25.4  | 1/1.5               |
| Co/Ni(BDC) <sub>2</sub> TED@CF(1/0.5) | Co(OAc) <sub>2</sub> (1.0 mM)<br>Ni(OAc) <sub>2</sub> (0.5 mM) | 19.22/9.81  | 24.7/11.9   | 1/0.5               |
| Co/Ni(BDC) <sub>2</sub> TED@CF(1/1)   | Co(OAc) <sub>2</sub> (1.0 mM)<br>Ni(OAc) <sub>2</sub> (1.0 mM) | 18.17/17.27 | 18.9/17.7   | 1/1                 |

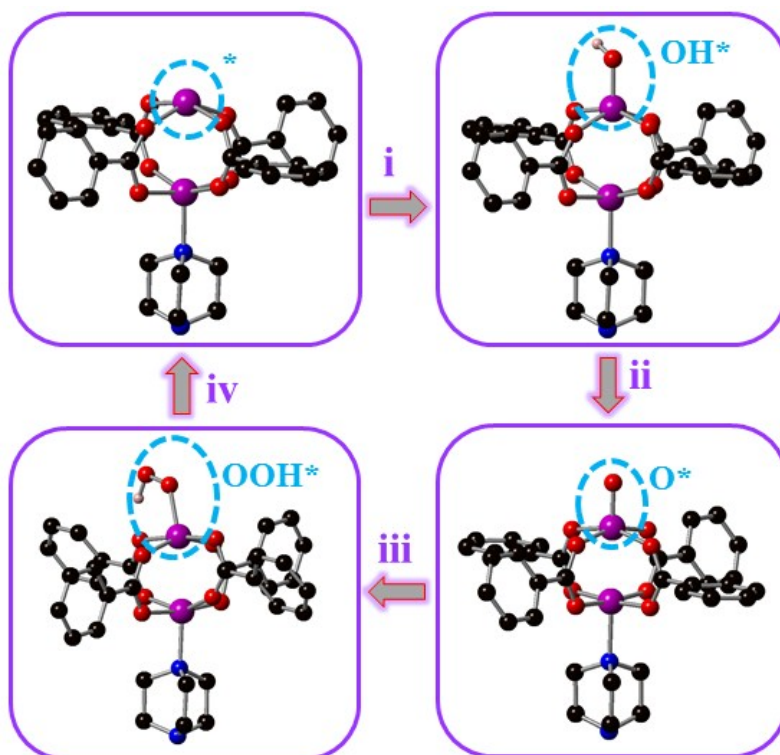

**Figure S36.** The DFT calculation model of OER process on metal sites in the structure of  $\text{Co}_2(\text{BDC})_2\text{TED}$  with [001] orientation .

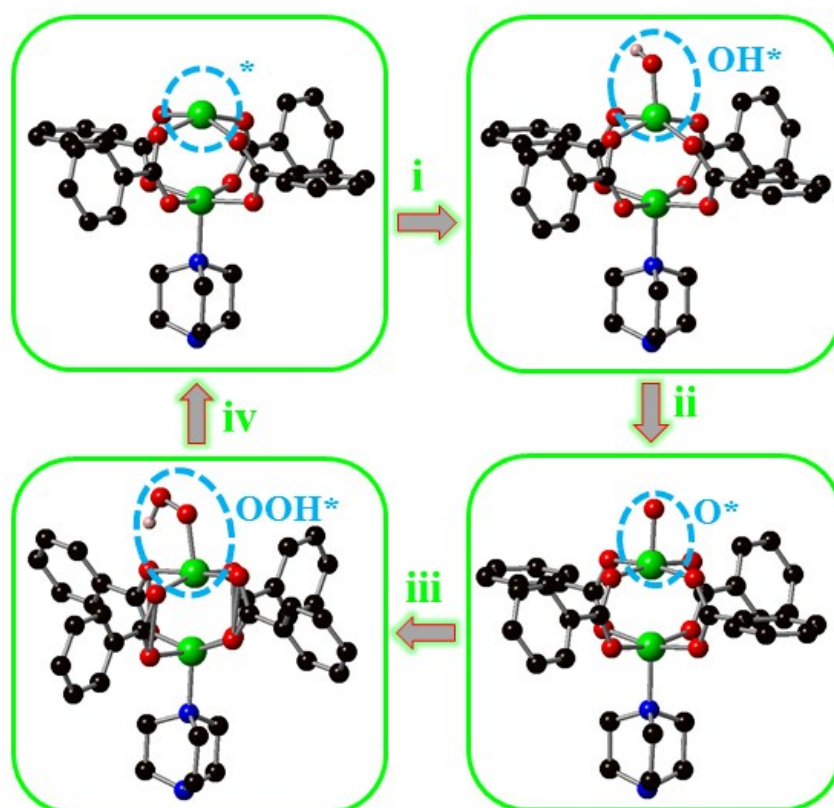

**Figure S37.** The DFT calculation model of OER process on metal sites in the structure of  $\text{Ni}_2(\text{BDC})_2\text{TED}$  with [001] orientation.

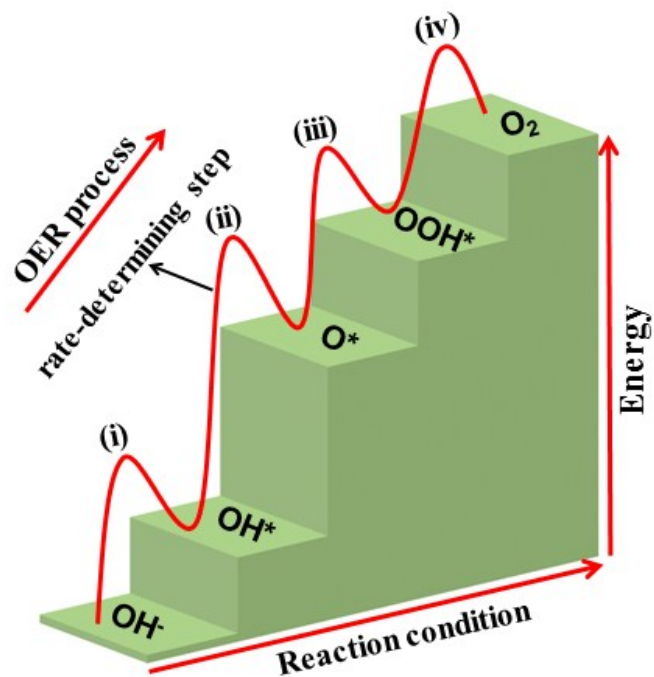

**Figure S38.** The diagrammatic graph of OER process in Co/Ni(BDC)<sub>2</sub>TED nanosheets.

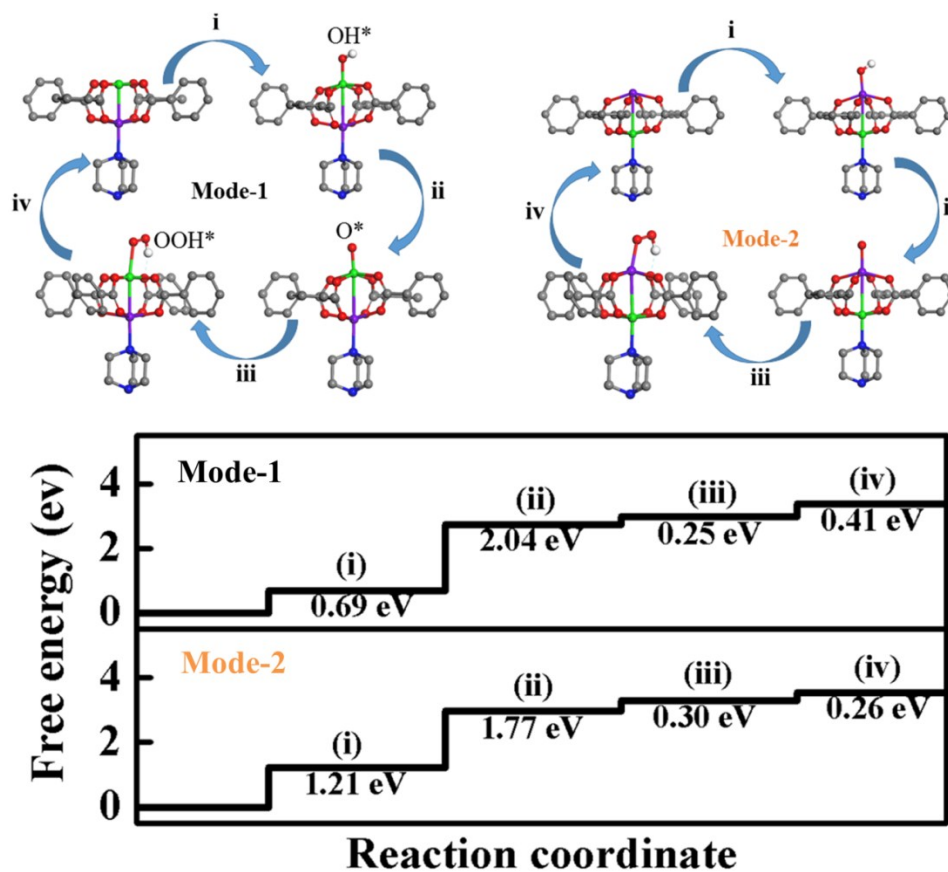

**Figure S39.** The Gibbs free energy changes of Co/Ni(BDC)<sub>2</sub>TED nanosheets with two different models.
